# Supplementary material for: Metabolomics Study on Pathogenic and Non-pathogenic E. coli with Closely Related Genomes with a Focus on Yersiniabactin and Its Known and Novel Derivatives
Source: PubMed Central journal article supplement (PMC7344775; doi:10.3390/metabo10060221), 2020-05-28
Supplement: metabolites-10-00221-s001.pdf [file metabolites-10-00221-s001.pdf]

Article

# Metabolomics study on pathogenic and non-pathogenic *E. coli* with closely related genomes with focus on yersiniabactin and its known and novel derivatives

Mareike Schulz<sup>1</sup>, Vasiliki Gaitanoglou<sup>1</sup>, Olena Mantel<sup>2</sup>, Yannick Hövelmann<sup>1</sup>, Florian Hübner<sup>1</sup>, Ulrich Dobrindt<sup>2,\*</sup> and Hans-Ulrich Humpf<sup>1,\*</sup>

<sup>1</sup> Institute of Food Chemistry, Westfälische Wilhelms-Universität Münster, Corrensstraße 45, 48149 Münster, Germany; m\_sch065@uni-muenster.de (M.S.); vasilikigaitanoglou@yahoo.de (V.G.); yannick.hoevelmann@uni-muenster.de (Y.H.); florian.huebner@uni-muenster.de (F.H.)

<sup>2</sup> Institute of Hygiene, Universitätsklinikum Münster, Germany, Mendelstraße 7, 48149 Münster, Germany; olena.mantel@ukmuenster.de (O.M)

\* Correspondence: dobrindt@uni-muenster.de, Tel: +49-251-980-2875, Fax: +49-251-980-2868 (U.D.) humpf@uni-muenster.de, Tel: +49-251-83-33391, Fax: +49-251-83-33396 (H.-U.H.);

**Supplementary Materials**

## Tables

**Table S1.** Comparison of intensities of the chosen features from the features list after data processing by MZmine 2.

| Chosen discriminating features <sup>1</sup> | EcN          |       |       | <i>E. coli</i> 83972 |       |       | <i>E. coli</i> CFT073 |       |       | Blank |
|---------------------------------------------|--------------|-------|-------|----------------------|-------|-------|-----------------------|-------|-------|-------|
|                                             | MW replicate |       |       | MW replicate         |       |       | MW replicate          |       |       | MW    |
|                                             | 1            | 2     | 3     | 1                    | 2     | 3     | 1                     | 2     | 3     | 1     |
| 1, 482.1229, 13.25                          | 2E+06        | 1E+06 | 2E+06 | 0E+00                | 0E+00 | 0E+00 | 0E+00                 | 0E+00 | 0E+00 | 0E+00 |
| 2, 295.0565, 13.26                          | 4E+06        | 3E+06 | 4E+06 | 0E+00                | 2E+04 | 5E+03 | 0E+00                 | 0E+00 | 0E+00 | 0E+00 |
| 3, 482.1229, 14.21                          | 5E+06        | 4E+06 | 5E+06 | 0E+00                | 0E+00 | 0E+00 | 0E+00                 | 0E+00 | 0E+00 | 0E+00 |
| 4, 295.0565, 14.21                          | 8E+06        | 7E+06 | 8E+06 | 0E+00                | 1E+05 | 0E+00 | 0E+00                 | 0E+00 | 0E+00 | 0E+00 |
| 5, 535.0340, 11.00                          | 2E+06        | 2E+06 | 2E+06 | 0E+00                | 6E+04 | 6E+03 | 0E+00                 | 0E+00 | 0E+00 | 0E+00 |
| 6, 498.1178, 8.32                           | 5E+05        | 4E+05 | 4E+05 | 5E+03                | 0E+00 | 0E+00 | 0E+00                 | 0E+00 | 0E+00 | 0E+00 |
| 7, 311.0516, 8.31                           | 1E+06        | 9E+05 | 1E+06 | 0E+00                | 6E+03 | 0E+00 | 0E+00                 | 0E+00 | 0E+00 | 0E+00 |
| 8, 601.1270, 7.11                           | 3E+06        | 3E+06 | 3E+06 | 0E+00                | 9E+04 | 7E+03 | 0E+00                 | 4E+03 | 0E+00 | 0E+00 |
| 9, 414.0606, 7.12                           | 1E+06        | 9E+05 | 1E+06 | 0E+00                | 7E+03 | 0E+00 | 0E+00                 | 0E+00 | 0E+00 | 0E+00 |
| 10, 307.0201, 13.88                         | 4E+05        | 3E+05 | 4E+05 | 0E+00                | 2E+04 | 0E+00 | 0E+00                 | 0E+00 | 0E+00 | 0E+00 |
| 11, 365.0986, 14.42                         | 2E+05        | 2E+05 | 2E+05 | 0E+00                | 0E+00 | 0E+00 | 0E+00                 | 0E+00 | 0E+00 | 0E+00 |
| 12, 323.0550, 7.05                          | 3E+06        | 2E+06 | 3E+06 | 1E+04                | 2E+05 | 5E+04 | 0E+00                 | 0E+00 | 0E+00 | 0E+00 |
| 13, 279.0651, 7.05                          | 6E+05        | 4E+05 | 5E+05 | 5E+03                | 2E+04 | 0E+00 | 0E+00                 | 0E+00 | 0E+00 | 0E+00 |
| 14, 543.0369, 9.59                          | 5E+06        | 4E+06 | 4E+06 | 2E+05                | 9E+05 | 2E+05 | 0E+00                 | 0E+00 | 0E+00 | 0E+00 |
| 15, 355.9706, 9.58                          | 6E+06        | 5E+06 | 5E+06 | 3E+05                | 1E+06 | 3E+05 | 0E+00                 | 0E+00 | 0E+00 | 0E+00 |
| 16, 565.2345, 6.97                          | 4E+06        | 4E+06 | 3E+06 | 2E+06                | 2E+06 | 2E+06 | 2E+07                 | 2E+07 | 2E+07 | 0E+00 |

<sup>1</sup>No. of the feature, *m/z*, and retention time [min]

**Table S2.** Determined OD values at 600 nm of the culture samples of *E. coli* strains EcN, 83972 and CFT073. The cultivation was carried out for 6 h at 37 °C in minimum essential medium without shaking.

| <i>E. coli</i> strain | Replicate | OD-value | pH   |
|-----------------------|-----------|----------|------|
| EcN                   | 1         | 0.504    | 9.20 |
|                       | 2         | 0.451    | 9.21 |
|                       | 3         | 0.518    | 9.20 |
| 83972 <sup>1</sup>    | 1         | 0.232    | 9.22 |
|                       | 2         | 0.222    | 9.22 |
|                       | 3         | 0.192    | 9.22 |
| CFT073                | 1         | 0.515    | 9.17 |
|                       | 2         | 0.562    | 9.17 |
|                       | 3         | 0.468    | 9.18 |
| Blank sample          | 1         | -        | 9.11 |

<sup>1</sup>Visible formation of a biofilm at the bottom of the flask.

**Table S3.** Numerous novel derivatives of Ybt detected in the pre-concentrated culture supernatant of EcN during the isolation of ulbactin B. Characterization is based on their exact mass, isotope pattern and fragmentation behavior.

| <i>m/z</i> of [M+H] <sup>+</sup> ion (measured) | Predicted molecular formula of [M+H] <sup>+</sup>                                                                  | <i>m/z</i> of [M+H] <sup>+</sup> ion (calculated) | Different isomeric forms (abbreviation)                     |                                                             |
|-------------------------------------------------|--------------------------------------------------------------------------------------------------------------------|---------------------------------------------------|-------------------------------------------------------------|-------------------------------------------------------------|
| 482.1239                                        | C <sub>21</sub> H <sub>28</sub> N <sub>3</sub> O <sub>4</sub> S <sub>3</sub> <sup>+</sup><br>(Δ <i>m</i> 0.5 ppm)  | 482.1236                                          | Isomer A <sub>1</sub> <sup>1</sup><br>(Ybt-A <sub>1</sub> ) | Isomer A <sub>2</sub> <sup>1</sup><br>(Ybt-A <sub>2</sub> ) |
| 498.1188                                        | C <sub>21</sub> H <sub>28</sub> N <sub>3</sub> O <sub>5</sub> S <sub>3</sub> <sup>+</sup><br>(Δ <i>m</i> 0.5 ppm)  | 498.1186                                          | Isomer A <sup>1</sup><br>(1-A)                              | Isomer B<br>(1-B)                                           |
| 601.1282                                        | C <sub>24</sub> H <sub>33</sub> N <sub>4</sub> O <sub>6</sub> S <sub>4</sub> <sup>+</sup><br>(Δ <i>m</i> 0.8 ppm)  | 601.1277                                          | Isomer A <sup>1</sup><br>(2-A)                              | Isomer B<br>(2-B)                                           |
| 615.1433                                        | C <sub>25</sub> H <sub>35</sub> N <sub>4</sub> O <sub>6</sub> S <sub>4</sub> <sup>+</sup><br>(Δ <i>m</i> -0.2 ppm) | 615.1434                                          | Isomer A<br>(3-A)                                           | Isomer B<br>(3-B)                                           |
| 633.1003                                        | C <sub>24</sub> H <sub>33</sub> N <sub>4</sub> O <sub>6</sub> S <sub>5</sub> <sup>+</sup><br>(Δ <i>m</i> -0.8 ppm) | 633.0998                                          | Isomer A<br>(4-A)                                           | Isomer B<br>(4-B)                                           |
| 587.1127                                        | C <sub>23</sub> H <sub>31</sub> N <sub>4</sub> O <sub>6</sub> S <sub>4</sub> <sup>+</sup><br>(Δ <i>m</i> 1.0 ppm)  | 587.1121                                          | Isomer A<br>(5-A)                                           | Isomer B<br>(5-B)                                           |
| 530.0911                                        | C <sub>21</sub> H <sub>28</sub> N <sub>3</sub> O <sub>5</sub> S <sub>4</sub> <sup>+</sup><br>(Δ <i>m</i> 0.9 ppm)  | 530.0906                                          | Isomer B<br>(6-B)                                           | Isomer A<br>(6-A)                                           |
| 508.1391                                        | C <sub>23</sub> H <sub>30</sub> N <sub>3</sub> O <sub>4</sub> S <sub>3</sub> <sup>+</sup><br>(Δ <i>m</i> -0.4 ppm) | 508.1393                                          | Three Isomers A<br>(7-A <sub>1-3</sub> )                    |                                                             |

<sup>1</sup>Features from the metabolomics study.

**Table S4.** Parameters for the chromatographic conditions for the metabolomics study based on the application of LC-HRMS.

|                                  |                                                                                                                              |       |       |
|----------------------------------|------------------------------------------------------------------------------------------------------------------------------|-------|-------|
| <b>Column</b>                    | Nucleodur® C18 Gravity-SB column (150 × 2 mm, 3 μm) with a 4 × 2 mm Gravity SB guard column (Macherey-Nagel, Düren, Germany) |       |       |
| <b>Gradient:</b>                 | Start                                                                                                                        | 5% A  | 95% B |
| <b>A: ACN+0.1% FA</b>            | 0 - 1 min                                                                                                                    | 5% A  | 95% B |
| <b>B: H<sub>2</sub>O+0.1% FA</b> | up to 26 min                                                                                                                 | 95% A | 5% B  |
|                                  | 26 – 28 min                                                                                                                  | 95% A | 5% B  |
|                                  | 28 – 35 min                                                                                                                  | 5% A  | 95% B |
| <b>Flow rate</b>                 | 0.35 mL/min                                                                                                                  |       |       |
| <b>Injection volume</b>          | 10 μL                                                                                                                        |       |       |
| <b>Column temperature</b>        | 40 °C                                                                                                                        |       |       |
| <b>Autosampler temperature</b>   | 4 °C                                                                                                                         |       |       |
| <b>Additional detector</b>       | DAD, 190 nm - 800 nm                                                                                                         |       |       |

**Table S5.** Parameters for the LTQ Orbitrap XL™ mass spectrometer with heated electrospray ionization for the metabolomics study based on the application of LC-HRMS.

|                              |                                                                                                                                                                       |
|------------------------------|-----------------------------------------------------------------------------------------------------------------------------------------------------------------------|
| <b>Mass spectrometer</b>     | LTQ Orbitrap XL™ equipped with HESI probe (Thermo Fisher Scientific, Dreieich, Germany)                                                                               |
| <b>Source</b>                | HESI                                                                                                                                                                  |
| <b>Polarity</b>              | positive                                                                                                                                                              |
| <b>Scan event</b>            | 1: Full scan, mass range: $m/z$ 100-1000, resolution 30 000 ( $m/z$ 400), profile mode, AGC on, maximum fill time 25 ms                                               |
| <b>Heater temperature</b>    | 350 °C                                                                                                                                                                |
| <b>Capillary temperature</b> | 350 °C                                                                                                                                                                |
| <b>Sheath gas</b>            | 40 arbitrary units                                                                                                                                                    |
| <b>Aux gas</b>               | 20 arbitrary units                                                                                                                                                    |
| <b>Sweep gas</b>             | 10 arbitrary units                                                                                                                                                    |
| <b>Source voltage</b>        | 4 000 V                                                                                                                                                               |
| <b>Capillary voltage</b>     | 20 V                                                                                                                                                                  |
| <b>Tube lens voltage</b>     | 125 V                                                                                                                                                                 |
| <b>Diverter valve</b>        | 0-2 min: waste<br>2-35 min: MS                                                                                                                                        |
| <b>Mass calibration</b>      | External calibration (manufacturer's calibration mix) prior to running each sequence by manual injection using a syringe pump, mass accuracies < 1 ppm for calibrants |

**Table S6.** Parameters of the different steps used for the data processing by MZmine 2 2.33 for the metabolomics study based on the application of LC-HRMS.

---

|                              |                            |                                                 |  |
|------------------------------|----------------------------|-------------------------------------------------|--|
| <b>Set sample parameters</b> |                            |                                                 |  |
| <b>Peak detection</b>        | Mass detection             | Scans: RT 2-30 min                              |  |
|                              |                            | Mass detector: exact mass<br>Noise level: 1.2E4 |  |
|                              | Chromatogram builder       | Scans: RT 2-30 min                              |  |
|                              |                            | Mass list: masses                               |  |
|                              |                            | Min time span (min): 0.05                       |  |
|                              |                            | Min height: 1.4E4                               |  |
|                              |                            | <i>m/z</i> tolerance:                           |  |
|                              |                            | 5.0E-4 <i>m/z</i> or 3.0 ppm                    |  |
|                              | Smoothing                  | Filter width: 5                                 |  |
|                              | Chromatogram deconvolution | Algorithm: local minimum search                 |  |
|                              |                            | Chromatographic threshold: 85%                  |  |
|                              |                            | Search minimum                                  |  |
|                              |                            | in RT range (min): 0.10                         |  |
|                              |                            | Minimum relative height: 0                      |  |
|                              |                            | Minimum absolute height: 1.4E4                  |  |
|                              |                            | Min ration of peak top/edge: 1.4                |  |
|                              |                            | Peak duration range (min):                      |  |
|                              |                            | 0.05 - 1.00                                     |  |

---

**Table S7.** Parameters of the different steps used for the data processing by MZmine 2 2.33 for the metabolomics study based on the application of LC-HRMS (continued).

---

|                    |                        |                                                                                                                                                                                 |
|--------------------|------------------------|---------------------------------------------------------------------------------------------------------------------------------------------------------------------------------|
| <b>Isotopes</b>    | Isotopic peaks grouper | <i>m/z</i> tolerance:<br>5.0E-4 <i>m/z</i> or 3.0 ppm<br>RT tolerance:<br>0.1 absolute (min)<br>Monotonic shape<br>Maximum charge: 2<br>Representative isotope:<br>most intense |
| <b>Alignment</b>   | Join aligner           | <i>m/z</i> tolerance:<br>5.0E-4 <i>m/z</i> or 3.0 ppm<br>Weight for <i>m/z</i> : 2<br>RT tolerance:<br>0.3 absolute (min)<br>Weight for RT: 1                                   |
| <b>Gap filling</b> | Peak finder            | Intensity tolerance: 50%<br><i>m/z</i> tolerance:<br>5.0E-4 <i>m/z</i> or 3.0 ppm<br>RT tolerance:<br>0.1 absolute (min)                                                        |

---

**Table S8.** Changed parameters of the fragmentation experiments for the LTQ Orbitrap XL<sup>TM</sup> mass spectrometer with heated electrospray ionization for the metabolomics study based on the application of LC-HRMS.

---

**Scan event:**

|                                                                                                                          |                                                                                                                                                                                                                                                                                                                                |                                                                                                                                                                                                                                                                                                                                                                 |
|--------------------------------------------------------------------------------------------------------------------------|--------------------------------------------------------------------------------------------------------------------------------------------------------------------------------------------------------------------------------------------------------------------------------------------------------------------------------|-----------------------------------------------------------------------------------------------------------------------------------------------------------------------------------------------------------------------------------------------------------------------------------------------------------------------------------------------------------------|
| <b>1:</b> Full scan, mass range: $m/z$ 100-1000, resolution 30 000 ( $m/z$ 400), profile mode, AGC on, maximum fill time | <b>2:</b> mass list ( <b>1</b> or <b>2</b> ), CID (35% relative normalized collision energy, activation time 30 ms, isolation width 1.7 Da), resolution 7 500 ( $m/z$ 400), centroid mode, AGC on, maximum fill time 100 ms, dynamic exclusion enabled (repetition count 3, repetition duration 15 s, exclusion duration 90 s) | <b>3:</b> data-dependent fragmentation of most intense ion observed in scan 2, CID (35% relative normalized collision energy, activation time 30 ms, isolation width 1.7 Da), resolution 7 500 ( $m/z$ 400), centroid mode, AGC on, maximum fill time 100 ms, dynamic exclusion enabled (repetition count 3, repetition duration 15 s, exclusion duration 90 s) |
|--------------------------------------------------------------------------------------------------------------------------|--------------------------------------------------------------------------------------------------------------------------------------------------------------------------------------------------------------------------------------------------------------------------------------------------------------------------------|-----------------------------------------------------------------------------------------------------------------------------------------------------------------------------------------------------------------------------------------------------------------------------------------------------------------------------------------------------------------|

**Mass list 1** (for MS2 and MS3):  
307.02, 365.10, 482.12, 498.12, 530.09, 587.11, 601.13, 615.14, 633.10

**Mass list 2** (ions after in source fragmentation, for MS3 and MS4):  
293.04, 295.06, 311.05, 343.02, 414.06, 428.08, 446.03

---

**Table S9.** Parameters for the chromatographic conditions for LC-MS/MS analysis.

|                                  |                                                                                                                             |       |       |
|----------------------------------|-----------------------------------------------------------------------------------------------------------------------------|-------|-------|
| <b>Column</b>                    | Nucleodur® C18 Gravity-SB column (10 x 2 mm, 3 µm) with a 4 x 2 mm Gravity SB guard column (Macherey-Nagel, Düren, Germany) |       |       |
| <b>Gradient:</b>                 | Start                                                                                                                       | 10% A | 90% B |
| <b>A: ACN+0.1% FA</b>            | 0 – 0.5 min                                                                                                                 | 10% A | 90% B |
| <b>B: H<sub>2</sub>O+0.1% FA</b> | 0.5 – 5 min                                                                                                                 | 30% A | 70% B |
|                                  | 5 – 13 min                                                                                                                  | 95% A | 5% B  |
|                                  | 13 – 15 min                                                                                                                 | 95% A | 5% B  |
|                                  | 15 – 20 min                                                                                                                 | 10% A | 90% B |
| <b>Flow rate</b>                 | 0.40 mL/min                                                                                                                 |       |       |
| <b>Injection volume</b>          | 10 µL                                                                                                                       |       |       |
| <b>Column temperature</b>        | 40 °C                                                                                                                       |       |       |
| <b>Autosampler temperature</b>   | 4 °C                                                                                                                        |       |       |

---

**Table S10.** Parameters for QTRAP® 5500 with electrospray ionization for LC-MS/MS analysis.

|                          |                                         |               |     |
|--------------------------|-----------------------------------------|---------------|-----|
| <b>Mass spectrometer</b> | QTRAP® 5500 (Sciex, Darmstadt, Germany) | <b>Source</b> | ESI |
|--------------------------|-----------------------------------------|---------------|-----|

---

|                                            |                 |                            |                                |
|--------------------------------------------|-----------------|----------------------------|--------------------------------|
| <b>Scan type</b>                           | MRM             | <b>Source Temperature</b>  | 500 °C                         |
| <b>Polarity</b>                            | Positive        | <b>Source voltage</b>      | 5 500 V                        |
| <b>Quadrupole resolution</b>               | Unit            | <b>Curtain gas (CUR)</b>   | 25 psi                         |
| <b>Declustering potential (DP)</b>         | 100 V           | <b>Nebulizer gas (GS1)</b> | 35 psi                         |
| <b>Entrance potential (EP)</b>             | 10 V            | <b>Heater gas (GS2)</b>    | 45 psi                         |
| <b>Collision Cell Exit Potential (CXP)</b> | 11 V            | <b>Diverter valve</b>      | 0-2 min: waste<br>2-20 min: MS |
| <b>Analyte ion [M+H]<sup>+</sup></b>       | <b>Q1 [m/z]</b> | <b>Q3 [m/z]</b>            | <b>Dwell time [ms]</b>         |
| [Ybt+H] <sup>+</sup>                       | 482.0           | 295.0                      | 15                             |
|                                            | 482.0           | 190.0                      | 15                             |
| [Fe(III)-Ybt+H] <sup>+</sup>               | 535.0           | 348.0                      | 15                             |
|                                            | 535.0           | 303.0                      | 15                             |
| [Cu(II)-Ybt+H] <sup>+</sup>                | 543.0           | 356.0                      | 15                             |
|                                            | 543.0           | 294.0                      | 15                             |
| [Escherichelin+H] <sup>+</sup>             | 307.0           | 261.0                      | 15                             |
|                                            | 307.0           | 203.0                      | 15                             |
| [Ulbactin B+H] <sup>+</sup>                | 365.0           | 212.0                      | 15                             |
|                                            | 365.0           | 190.2                      | 15                             |
| [(1-A)+H] <sup>+</sup>                     | 498.0           | 311.0                      | 15                             |
|                                            | 498.0           | 293.0                      | 15                             |
| [(2-A)+H] <sup>+</sup>                     | 601.0           | 414.0                      | 15                             |
|                                            | 601.0           | 261.0                      | 15                             |
|                                            |                 |                            | <b>Collision energy [V]</b>    |

**Table S11.** Parameters for the chromatographic separation for the isolation of ulbactin B by preparative HPLC-UV.

|                                  |                                                                                                                               |       |       |
|----------------------------------|-------------------------------------------------------------------------------------------------------------------------------|-------|-------|
| <b>Column</b>                    | Nucleodur® Phenyl-Hexyl column (250 x 10 mm, 5 µm) with a 4 x 2 mm Phenyl-Hexyl guard column (Macherey-Nagel, Düren, Germany) |       |       |
| <b>Gradient:</b>                 | Start                                                                                                                         | 20% A | 80% B |
| <b>A: ACN+0.1% FA</b>            | 0 – 0.5 min                                                                                                                   | 20% A | 80% B |
| <b>B: H<sub>2</sub>O+0.1% FA</b> | 0.5 – 20 min                                                                                                                  | 95% A | 5% B  |
|                                  | 20 – 22 min                                                                                                                   | 95% A | 5% B  |
|                                  | 22 – 29 min                                                                                                                   | 20% A | 80% B |
| <b>Flow rate</b>                 | 4.5 mL/min                                                                                                                    |       |       |
| <b>Injection volume</b>          | 250 µL                                                                                                                        |       |       |
| <b>Column temperature</b>        | 40 °C                                                                                                                         |       |       |
| <b>Detector</b>                  | DAD, 254 nm                                                                                                                   |       |       |

Figures



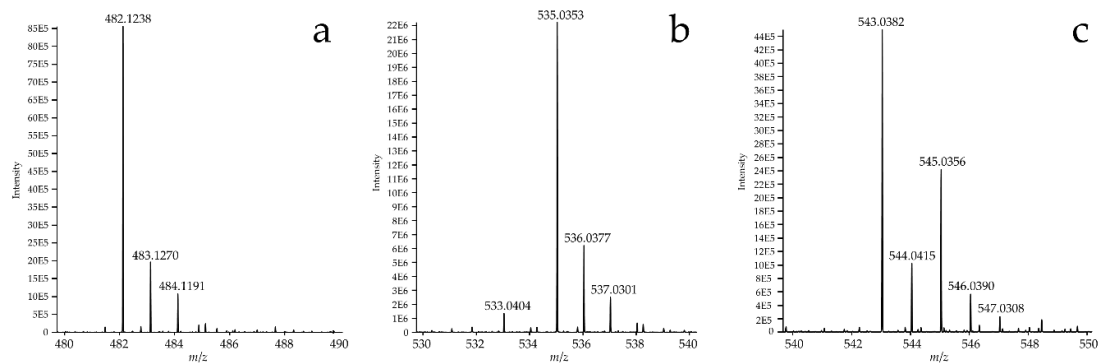

**Figure S1.** Isotope pattern of Ybt (a; feature No. \*1 and \*3,  $[M+H]^+$ :  $C_{21}H_{28}N_3O_4S_3^+$ , calculated:  $m/z$  482.1236, measured:  $m/z$  482.1238,  $\Delta m$  0.3 ppm), Fe(III)-Ybt (b; feature No. \*5,  $[M+H]^+$ :  $C_{21}H_{25}FeN_3O_4S_3^+$ , calculated:  $m/z$  535.0351, measured:  $m/z$  535.0353,  $\Delta m$  0.4 ppm) and Cu(II)-Ybt (c; feature No. \*14,  $[M+H]^+$ :  $C_{21}H_{26}CuN_3O_4S_3^+$ , calculated:  $m/z$  543.0376, measured:  $m/z$  543.0382,  $\Delta m$  1.1 ppm) by the application of LC-HRMS (LTQ Orbitrap XL<sup>TM</sup>).

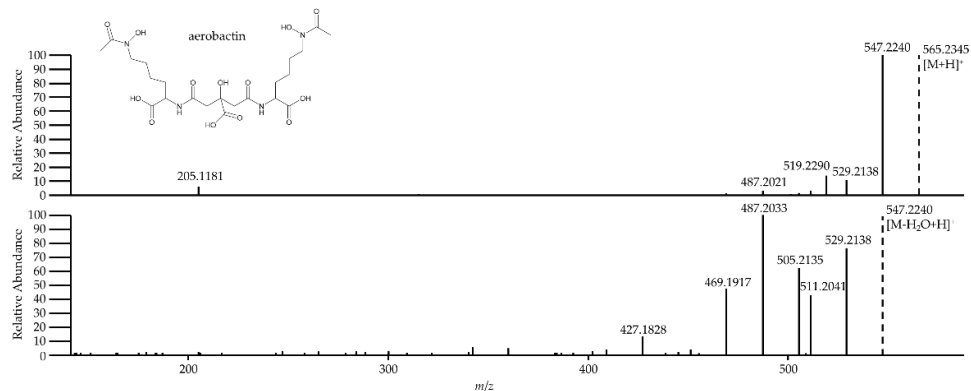

**Figure S2.** Fragmentation spectrum of aerobactin by the application of LC-MS/HRMS (LTQ Orbitrap XL<sup>TM</sup>, CID, 35%). Spectra shown: MS<sup>2</sup> spectrum of the  $[M+H]^+$  ion ( $m/z$  565.2345) and MS<sup>3</sup> spectrum of the  $[M-18+H]^+$  ion ( $m/z$  547.2240).

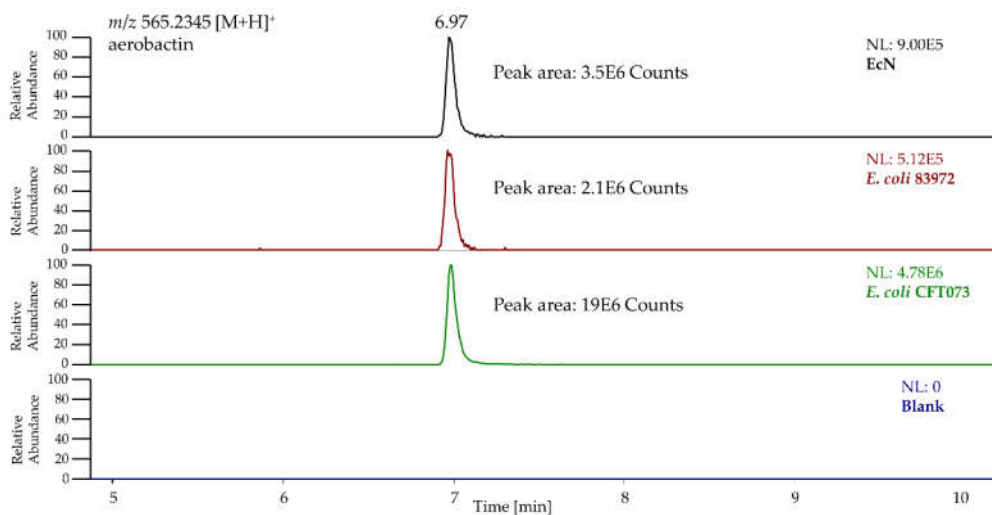

**Figure S3.** EIC (feature No. \*16, [M+H]<sup>+</sup>: C<sub>22</sub>H<sub>37</sub>N<sub>4</sub>O<sub>13</sub><sup>+</sup>, calculated: *m/z* 565.2352, measured: *m/z* 565.2345, Δ*m* -1,3 ppm) of the culture supernatant from *E. coli* strains EcN, 83972 and CFT073 and the blank sample by the application of LC-HRMS (LTQ Orbitrap XL™).

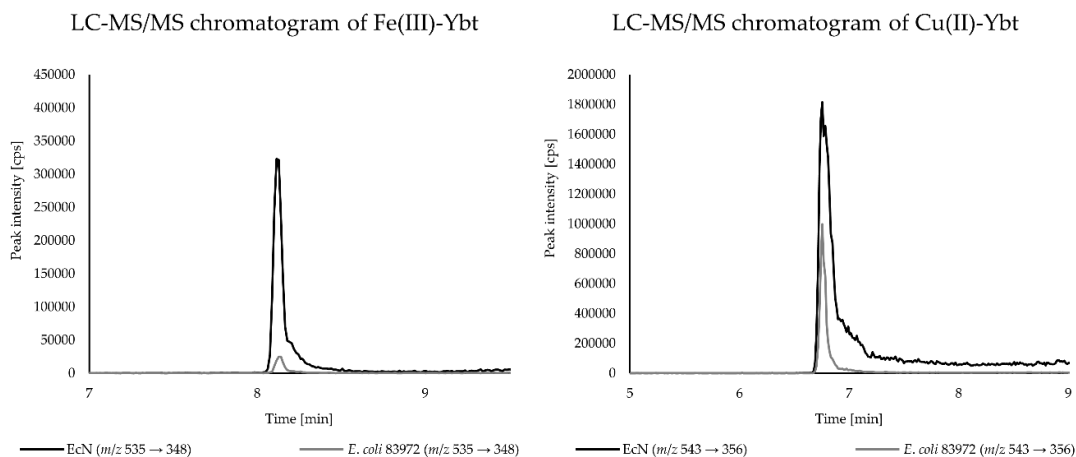

**Figure S4.** LC-MS/MS chromatogram (QTRAP® 5500) of the culture supernatant from *E. coli* strains EcN and 83972, displaying the two metal complexes of Ybt with the transition *m/z* 535 → 348 for Fe(III)-Ybt and *m/z* 543 → 356 for Cu(II)-Ybt.

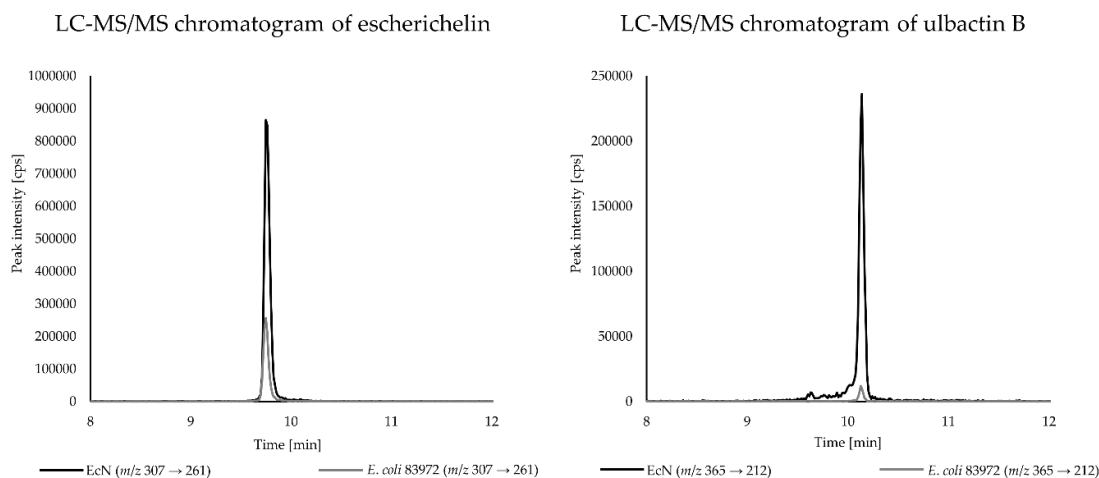

**Figure S5.** LC-MS/MS chromatogram (QTRAP® 5500) of the culture supernatant from *E. coli* strains EcN and 83972, displaying the known derivatives of Ybt with the transition *m/z* 307 → 261 for escherichelin and *m/z* 365 → 212 for ulbactin B.

LC-MS/MS chromatogram of the derivative 1-A

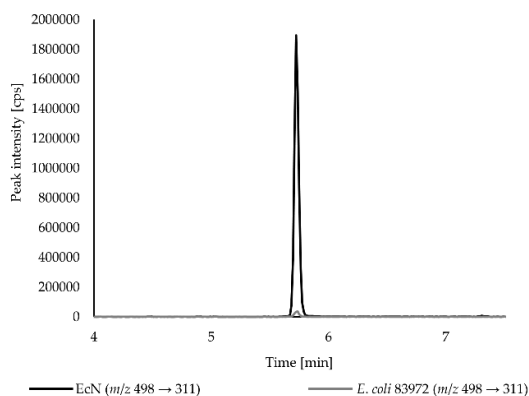

LC-MS/MS chromatogram of the derivative 2-A

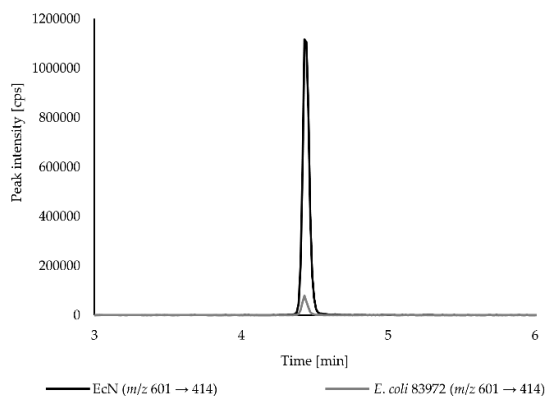

**Figure S6.** LC-MS/MS chromatogram (QTRAP® 5500) of the culture supernatant from *E. coli* strains EcN and 83972, displaying the novel Ybt derivatives with the transition  $m/z$  498  $\rightarrow$  311 for 1-A and  $m/z$  601  $\rightarrow$  414 for 2-A.

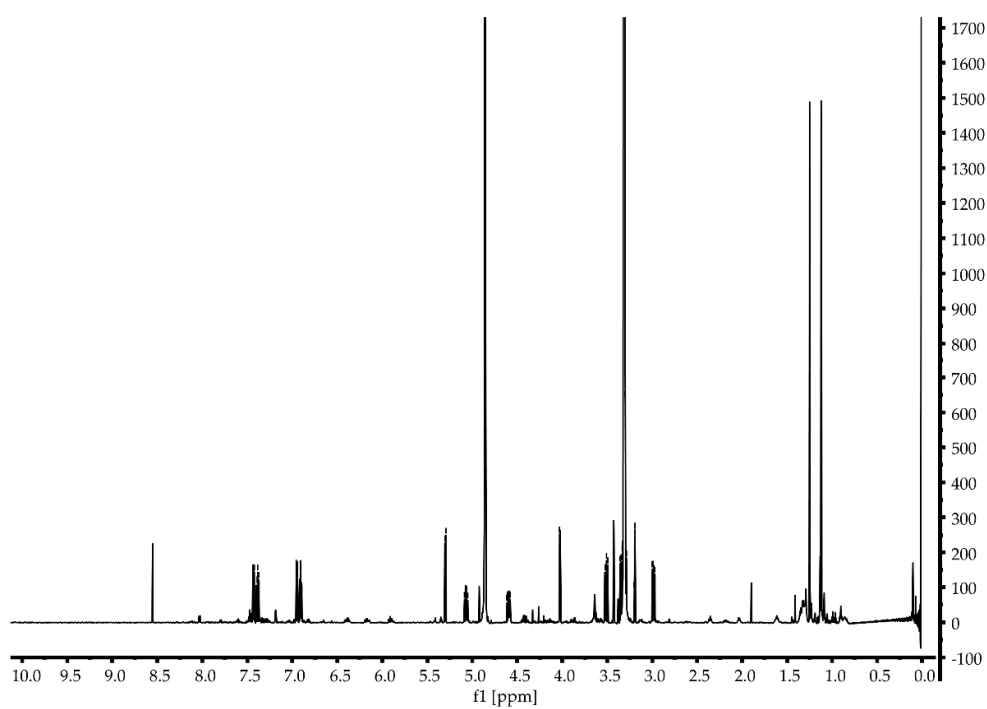

**Figure S7.**  $^1\text{H}$  NMR spectrum (600 MHz) of 0.2 mg ulbactin B in MeOD isolated from culture supernatant of EcN for identification in the metabolomics study.

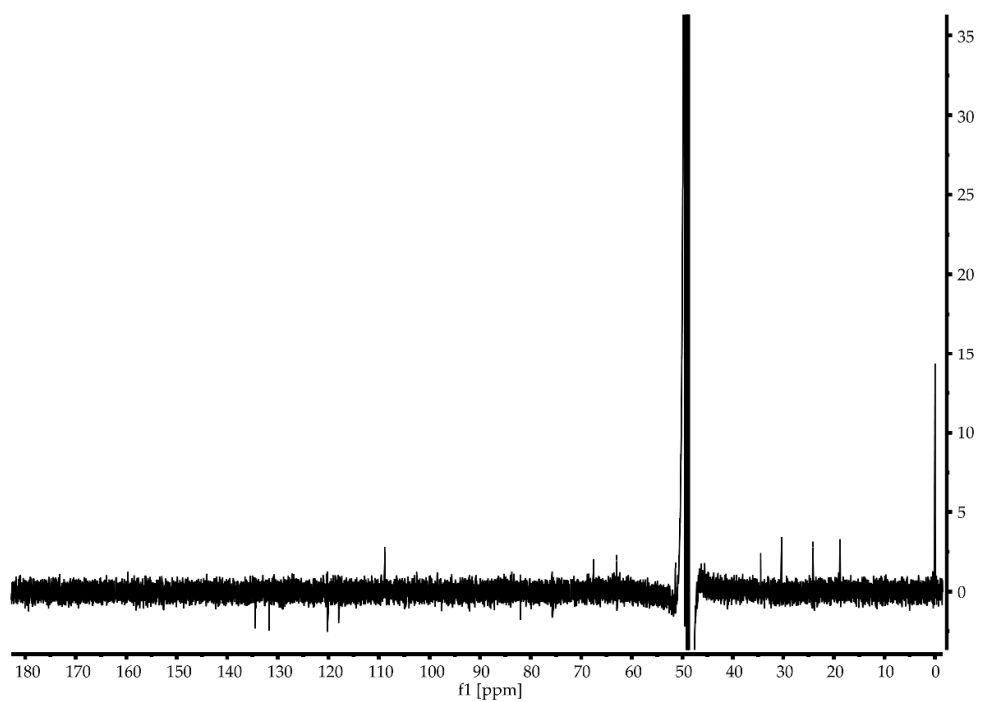

**Figure S8.**  $^{13}\text{C}$  NMR spectrum of 0.2 mg ulbactin B in MeOD isolated from culture supernatant of EcN for identification in the metabolomics study.

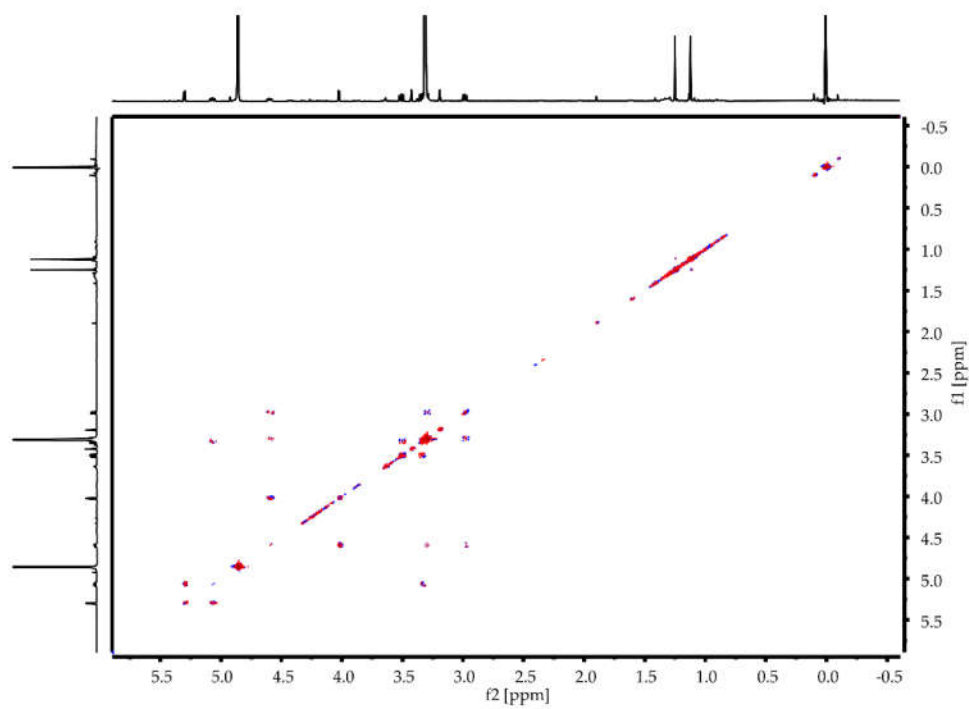

**Figure S9.** gCOSY NMR spectrum of 0.2 mg ulbactin B in MeOD isolated from culture supernatant of EcN for identification in the metabolomics study.

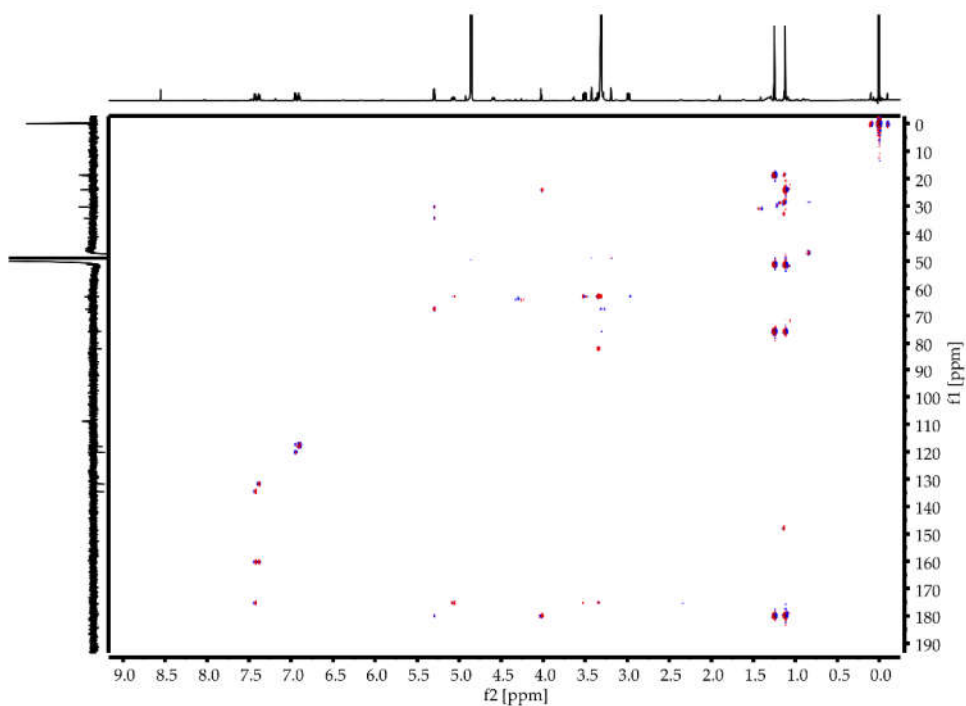

**Figure S10.** gHMBC NMR spectrum of 0.2 mg ulbactin B in MeOD isolated from culture supernatant of EcN for identification in the metabolomics study.

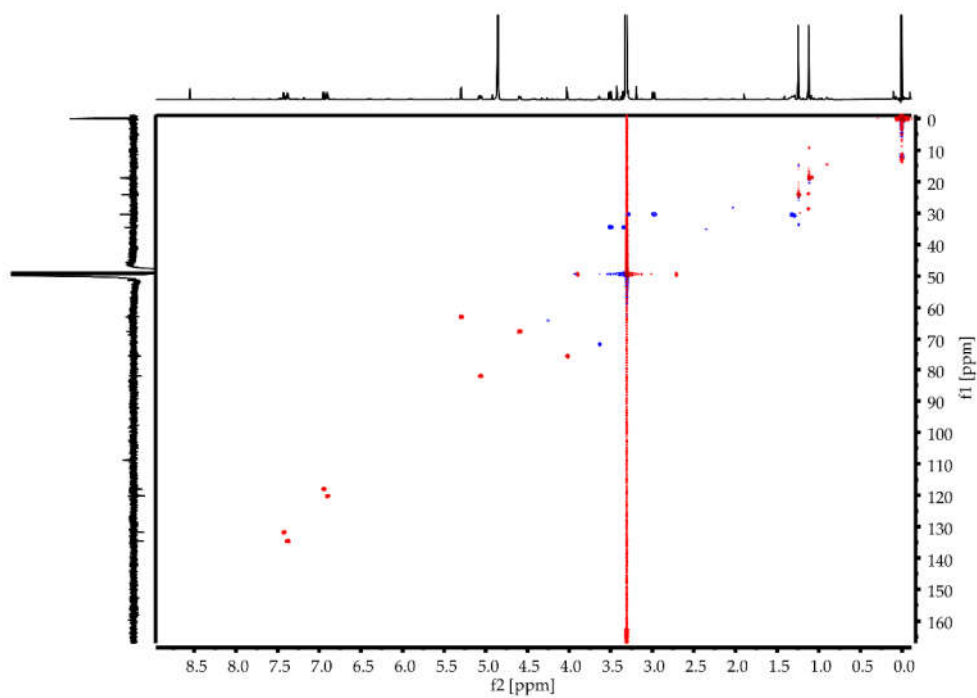

**Figure S11.** gHSQC NMR spectrum of 0.2 mg ulbactin B in MeOD isolated from culture supernatant of EcN for identification in the metabolomics study.

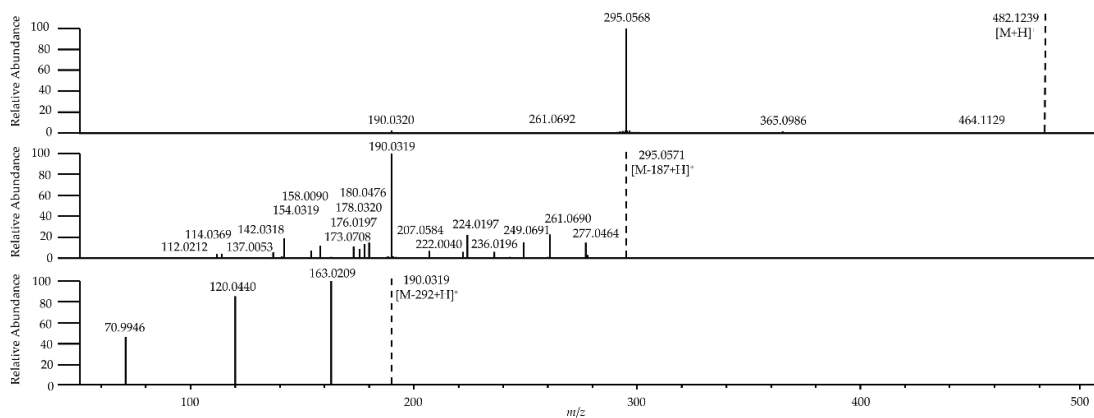

**Figure S12.** Fragmentation spectrum of isomer A<sub>1</sub> and A<sub>2</sub> of Ybt by the application of LC-MS/HRMS (LTQ Orbitrap XL™, CID, 35%). Spectra shown: MS<sup>2</sup> spectrum of the [M+H]<sup>+</sup> ion (*m/z* 482.1239), MS<sup>3</sup> spectrum of the [M-187+H]<sup>+</sup> ion (*m/z* 295.0571) and MS<sup>4</sup> spectrum of the [M-292+H]<sup>+</sup> ion (*m/z* 190.0319).

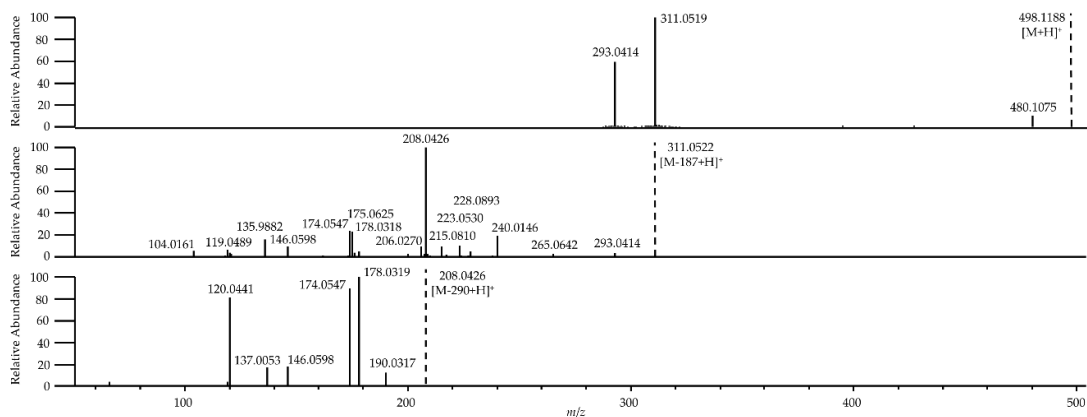

**Figure S13.** Fragmentation spectrum of the novel derivative 1-A by the application of LC-MS/HRMS (LTQ Orbitrap XL™, CID, 35%). Spectra shown: MS<sup>2</sup> spectrum of the [M+H]<sup>+</sup> ion (*m/z* 498.1188), MS<sup>3</sup> spectrum of the [M-187+H]<sup>+</sup> ion (*m/z* 311.0522) and MS<sup>4</sup> spectrum of the [M-290+H]<sup>+</sup> ion (*m/z* 208.0426).

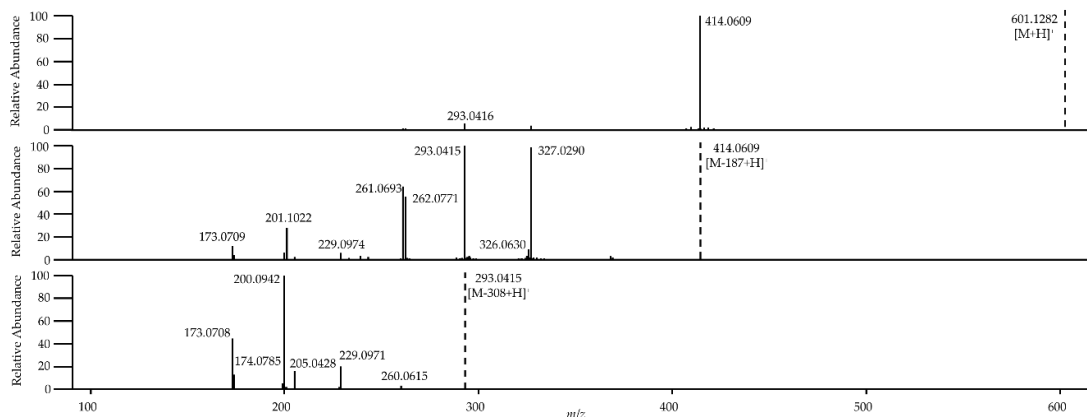

**Figure S14.** Fragmentation spectrum of the novel derivative 2-A by the application of LC-MS/HRMS (LTQ Orbitrap XL™, CID, 35%). Spectra shown: MS<sup>2</sup> spectrum of the [M+H]<sup>+</sup> ion (*m/z* 601.1282), MS<sup>3</sup> spectrum of the [M-187+H]<sup>+</sup> ion (*m/z* 414.0609) and MS<sup>4</sup> spectrum of the [M-308+H]<sup>+</sup> ion (*m/z* 293.0415).

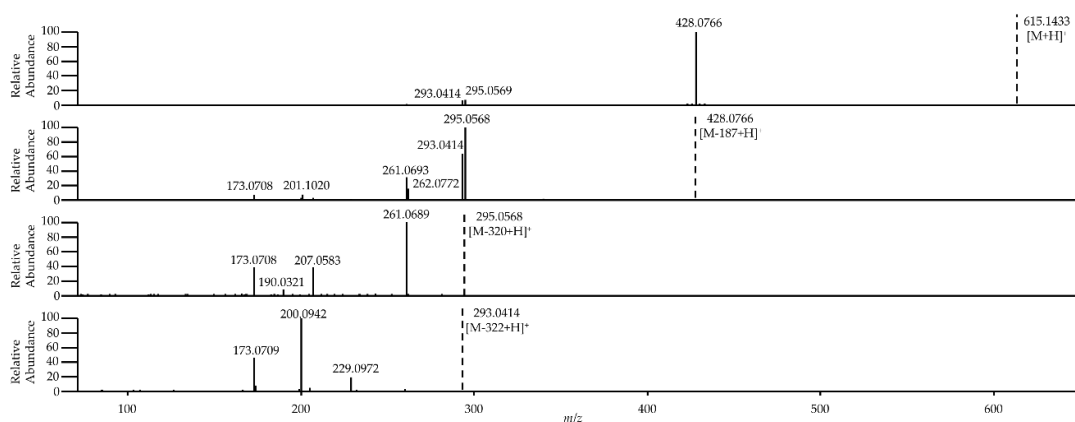

**Figure S15.** Fragmentation spectrum of the novel derivative 3-A by the application of LC-MS/HRMS (LTQ Orbitrap XL™, CID, 35%). Spectra shown: MS<sup>2</sup> spectrum of the [M+H]<sup>+</sup> ion (*m/z* 615.1433), MS<sup>3</sup> spectrum of the [M-187+H]<sup>+</sup> ion (*m/z* 428.0766) and MS<sup>4</sup> spectrum of the [M-320+H]<sup>+</sup> ion (*m/z* 295.0568) and of the [M-322+H]<sup>+</sup> ion (*m/z* 293.0414).

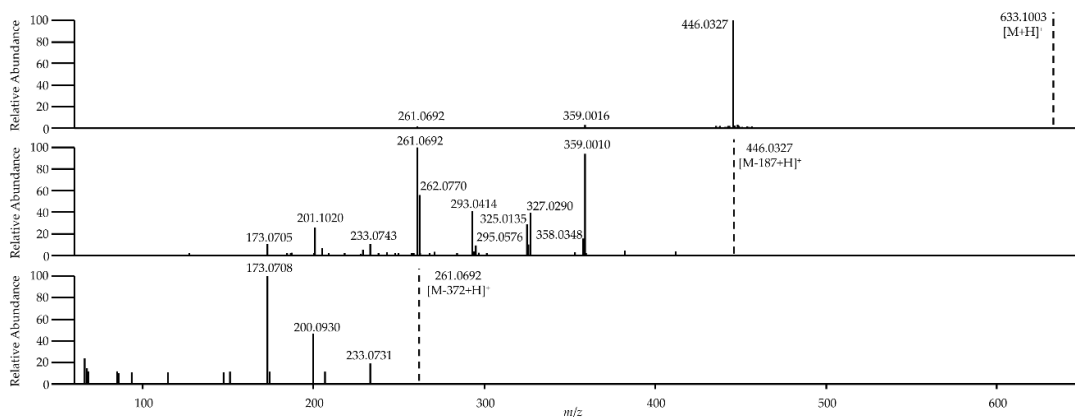

**Figure S16.** Fragmentation spectrum of the novel derivative 4-A by the application of LC-MS/HRMS (LTQ Orbitrap XL™, CID, 35%). Spectra shown: MS<sup>2</sup> spectrum of the [M+H]<sup>+</sup> ion (*m/z* 633.1003), MS<sup>3</sup> spectrum of the [M-187+H]<sup>+</sup> ion (*m/z* 446.0327) and MS<sup>4</sup> spectrum of the [M-372+H]<sup>+</sup> ion (*m/z* 261.0692).

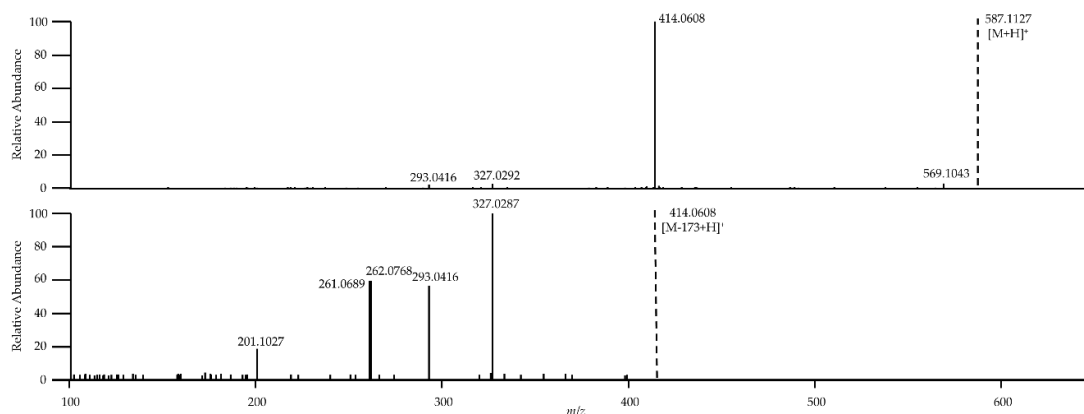

**Figure S17.** Fragmentation spectrum of the novel derivative 5-A by the application of LC-MS/HRMS (LTQ Orbitrap XL™, CID, 35%). Spectra shown: MS<sup>2</sup> spectrum of the [M+H]<sup>+</sup> ion (*m/z* 587.1127) and MS<sup>3</sup> spectrum of the [M-173+H]<sup>+</sup> ion (*m/z* 414.0608).

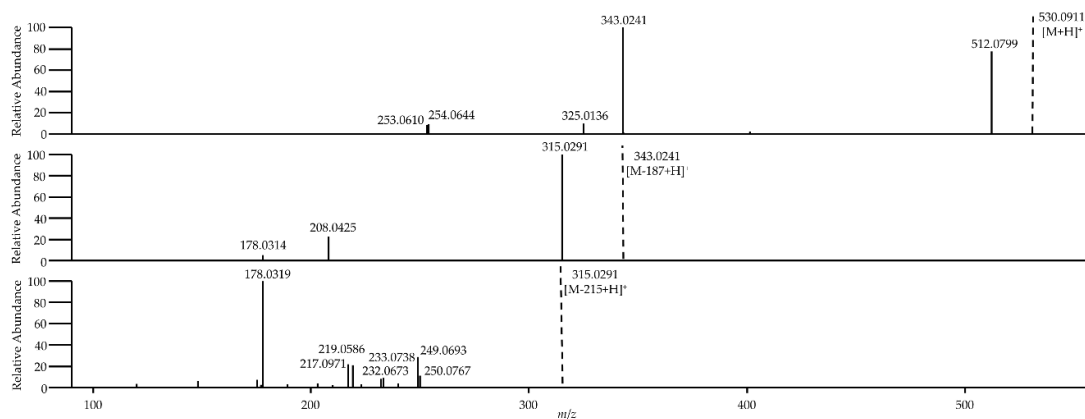

**Figure S18.** Fragmentation spectrum of the novel derivative 6-A by the application of LC-MS/HRMS (LTQ Orbitrap XL™, CID, 35%). Spectra shown: MS<sup>2</sup> spectrum of the [M+H]<sup>+</sup> ion (*m/z* 530.0911), MS<sup>3</sup> spectrum of the [M-187+H]<sup>+</sup> ion (*m/z* 343.0241) and MS<sup>4</sup> spectrum of the [M-215+H]<sup>+</sup> ion (*m/z* 315.0291).



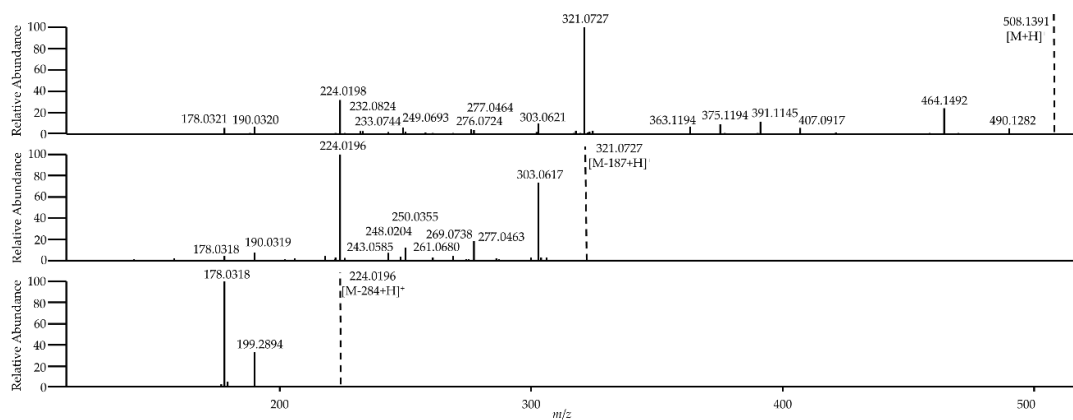

**Figure S19.** Fragmentation spectrum of the novel derivatives 7-A<sub>1-3</sub> by the application of LC-MS/HRMS (LTQ Orbitrap XL™, CID, 35%). Spectra shown: MS<sup>2</sup> spectrum of the [M+H]<sup>+</sup> ion (*m/z* 508.1391), MS<sup>3</sup> spectrum of the [M-187+H]<sup>+</sup> ion (*m/z* 321.0727) and MS<sup>4</sup> spectrum of the [M-284+H]<sup>+</sup> ion (*m/z* 224.0196).

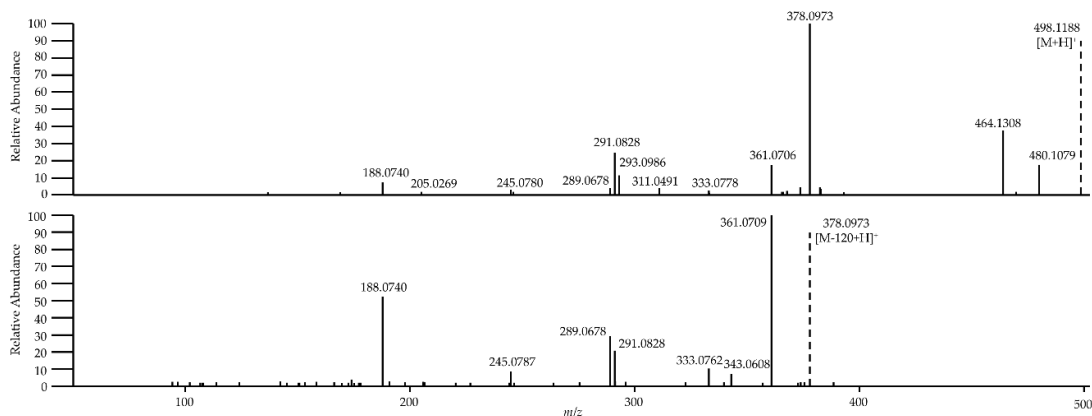

**Figure S20.** Fragmentation spectrum of the novel derivative 1-B by the application of LC-MS/HRMS (LTQ Orbitrap XL™, CID, 35%). Spectra shown: MS<sup>2</sup> spectrum of the [M+H]<sup>+</sup> ion (*m/z* 498.1188) and MS<sup>3</sup> spectrum of the [M-120+H]<sup>+</sup> ion (*m/z* 378.0973).

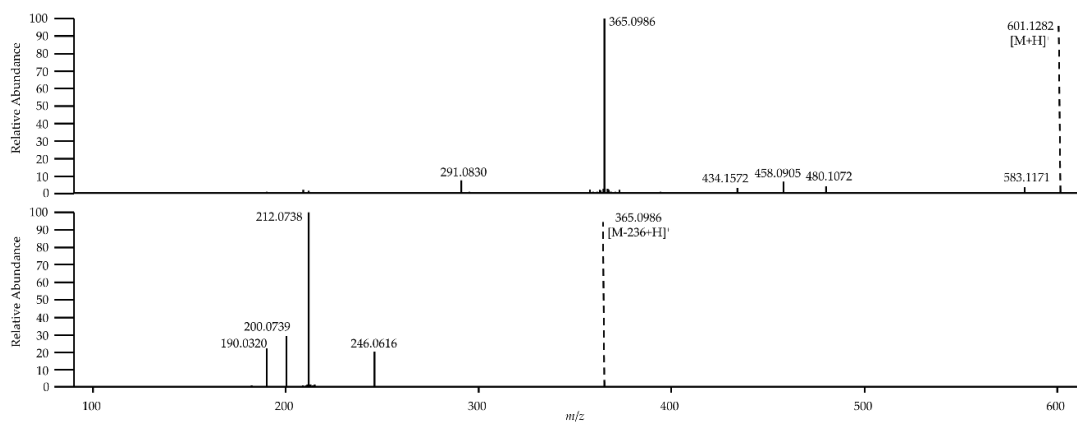

**Figure S21.** Fragmentation spectrum of the novel derivative 2-B by the application of LC-MS/HRMS (LTQ Orbitrap XL<sup>TM</sup>, CID, 35%). Spectra shown: MS<sup>2</sup> spectrum of the [M+H]<sup>+</sup> ion (*m/z* 601.1282) and MS<sup>3</sup> spectrum of the [M-236+H]<sup>+</sup> ion (*m/z* 365.0986).

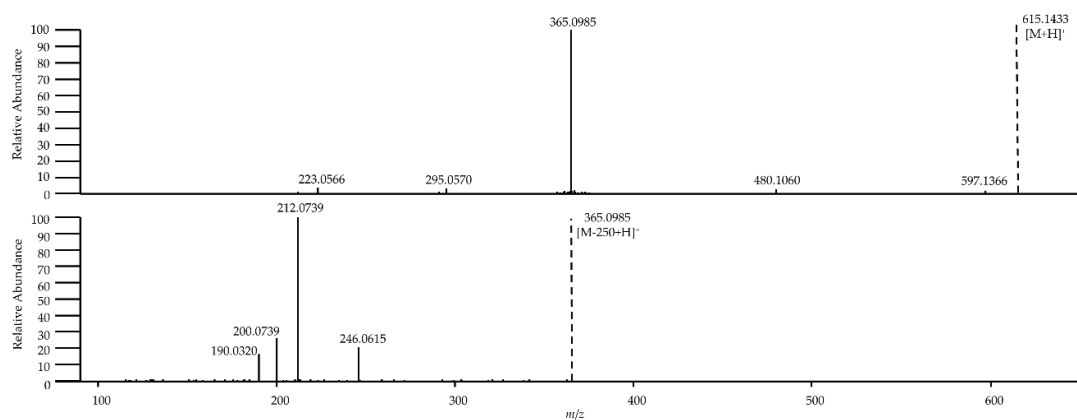

**Figure S22.** Fragmentation spectrum of the novel derivative 3-B by the application of LC-MS/HRMS (LTQ Orbitrap XL<sup>TM</sup>, CID, 35%). Spectra shown: MS<sup>2</sup> spectrum of the [M+H]<sup>+</sup> ion (*m/z* 615.1433) and MS<sup>3</sup> spectrum of the [M-250+H]<sup>+</sup> ion (*m/z* 365.0986).

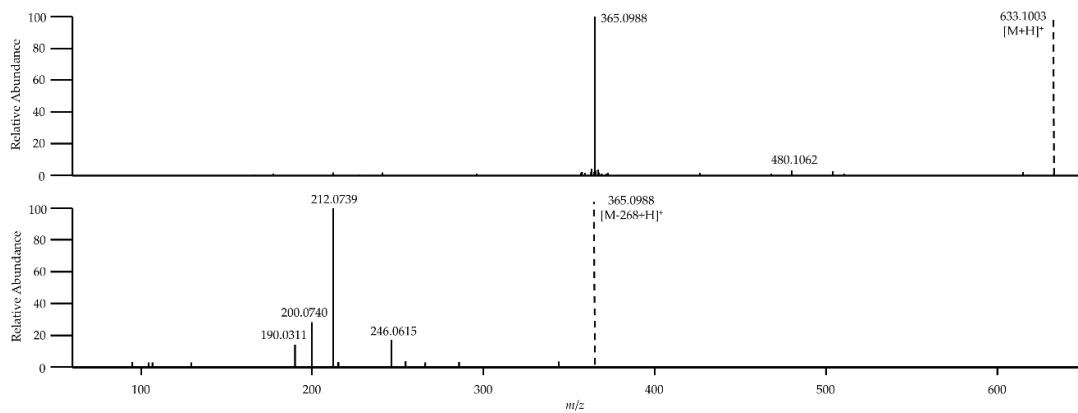

**Figure S23.** Fragmentation spectrum of the novel derivative 4-B by the application of LC-MS/HRMS (LTQ Orbitrap XL™, CID, 35%). Spectra shown: MS<sup>2</sup> spectrum of the [M+H]<sup>+</sup> ion (*m/z* 633.1003) and MS<sup>3</sup> spectrum of the [M-268+H]<sup>+</sup> ion (*m/z* 365.0986).

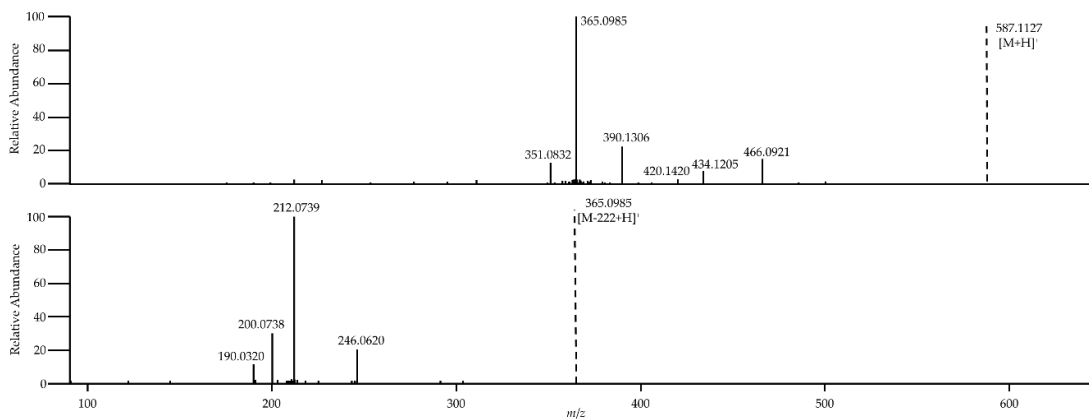

**Figure S24.** Fragmentation spectrum of the novel derivative 5-B by the application of LC-MS/HRMS (LTQ Orbitrap XL™, CID, 35%). Spectra shown: MS<sup>2</sup> spectrum of the [M+H]<sup>+</sup> ion (*m/z* 587.1127) and MS<sup>3</sup> spectrum of the [M-222+H]<sup>+</sup> ion (*m/z* 365.0986).

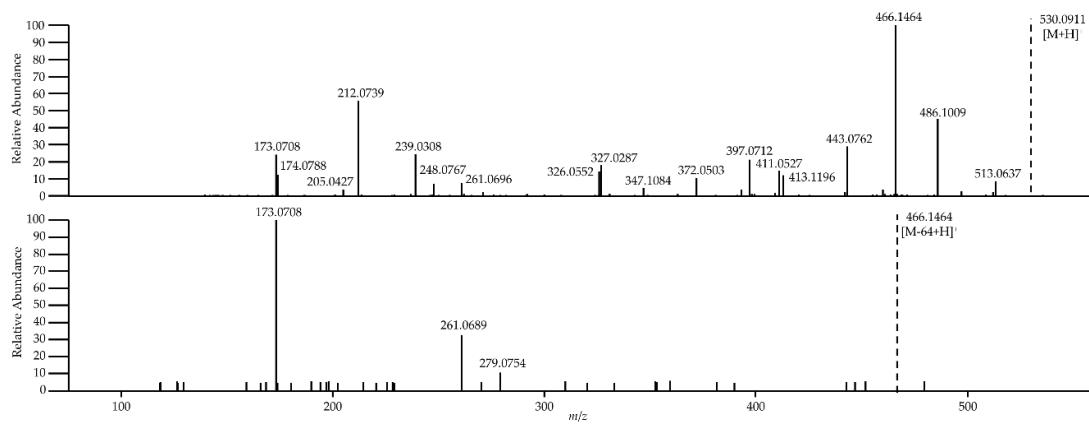

**Figure S25.** Fragmentation spectrum of the novel derivative 6-B by the application of LC-MS/HRMS (LTQ Orbitrap XL™, CID, 35%). Spectra shown: MS<sup>2</sup> spectrum of the [M+H]<sup>+</sup> ion ( $m/z$  530.0911) and MS<sup>3</sup> spectrum of the [M-64+H]<sup>+</sup> ion ( $m/z$  466.1464).
